# Supplementary material for: Evidence for Isolation-by-Habitat among Populations of an Epiphytic Orchid Species on a Small Oceanic Island
Source: PubMed Central journal article supplement (PMC3911949; doi:10.1371/journal.pone.0087469), 2014-02-03
Supplement: pone.0087469.s003.pdf [file pone.0087469.s003.pdf]

**Table S1.** Mean relative amounts of the volatile compounds identified in the floral scent of different population of *Jumellea rossii* emitted at dusk.

| <b>Compounds</b>    | <b>T<sub>R</sub><sup>a</sup></b> | <b>BBT<sup>b</sup></b> | <b>CL<sup>b</sup></b> | <b>SP<sup>b</sup></b> | <b>DG<sup>b</sup></b> | <b>MR<sup>b</sup></b> | <b>RBV<sup>b</sup></b> |
|---------------------|----------------------------------|------------------------|-----------------------|-----------------------|-----------------------|-----------------------|------------------------|
| <b>Monoterpenes</b> |                                  |                        |                       |                       |                       |                       |                        |
| Limonene            | 8.621                            | 2.18                   | 0.00                  | 0.00                  | 1.46                  | 0.00                  | 0.02                   |
| <b>Aromatics</b>    |                                  |                        |                       |                       |                       |                       |                        |
| Anisole             | 10.381                           | 5.48                   | 0.00                  | 0.12                  | 0.58                  | 0.00                  | 0.00                   |
| Benzaldehyde        | 12.684                           | 47.42                  | 60.62                 | 42.57                 | 44.71                 | 53.36                 | 61.46                  |
| Benzyl alcohol      | 16.713                           | 15.83                  | 16.31                 | 25.04                 | 20.10                 | 15.26                 | 10.30                  |
| Benzyl acetate      | 15.058                           | 21.97                  | 12.83                 | 25.01                 | 15.36                 | 16.31                 | 16.42                  |
| Benzyl benzoate     | 23.608                           | 0.00                   | 0.00                  | 0.00                  | 0.36                  | 0.03                  | 0.28                   |
| Chavicol            | 21.059                           | 0.22                   | 0.15                  | 0.15                  | 0.59                  | 1.02                  | 0.38                   |
| Dichlorobenzene     | 11.633                           | 0.25                   | 0.00                  | 0.00                  | 3.01                  | 0.09                  | 0.00                   |
| Eugenol             | 19.579                           | 6.65                   | 10.08                 | 7.10                  | 13.41                 | 13.66                 | 11.42                  |
| Vanillin            | 23.885                           | 0.00                   | 0.02                  | 0.00                  | 0.43                  | 0.28                  | 0.00                   |

(a) T<sub>R</sub> : Retention times on apolar column SPB-5.

(b) Relative percentages calculated from the peak areas of the chromatogram
